# Supplementary material for: Dietary l-Tryptophan Supplementation Enhances the Intestinal Mucosal Barrier Function in Weaned Piglets: Implication of Tryptophan-Metabolizing Microbiota
Source: PubMed Central journal article supplement (PMC6337174; doi:10.3390/ijms20010020), 2018-12-21
Supplement: ijms-20-00020-s001.pdf [file ijms-20-00020-s001.pdf]

## Online Supporting Material

**Supplementary Table S1.** Ingredients and chemical composition of experimental diets (day 0-14). The basal diets of phase I (7-11 kg BW of piglets). BW: Body weight; DE: Digestible energy; CP: Crude protein.

| Items                                 | Diets |          |          |          |
|---------------------------------------|-------|----------|----------|----------|
|                                       | Ctrl  | 0.1% Trp | 0.2% Trp | 0.4% Trp |
| Ingredients%                          |       |          |          |          |
| Corn                                  | 46.2  | 46.2     | 46.2     | 46.2     |
| Extruded corn                         | 12    | 12       | 12       | 12       |
| Soybean meal (46%)                    | 15.31 | 15.31    | 15.31    | 15.31    |
| Extruded-soybean                      | 10    | 10       | 10       | 10       |
| Fish meal (63.0%)                     | 4     | 4        | 4        | 4        |
| Whey powder                           | 6.5   | 6.5      | 6.5      | 6.5      |
| Cornstarch                            | 0.064 | 0.052    | 0.039    | 0.013    |
| Soybean oil                           | 2     | 2        | 2        | 2        |
| L-Lysine (99.0%)                      | 0.15  | 0.15     | 0.15     | 0.15     |
| Trp (98.0%)                           | 0     | 0.102    | 0.204    | 0.408    |
| L-Alanine (99.8%)                     | 0.446 | 0.356    | 0.267    | 0.089    |
| Limestone powder                      | 0.81  | 0.81     | 0.81     | 0.81     |
| Dicalcium phosphate                   | 1.12  | 1.12     | 1.12     | 1.12     |
| Salt                                  | 0.4   | 0.4      | 0.4      | 0.4      |
| 1% Premix                             | 1     | 1        | 1        | 1        |
| Total                                 | 100   | 100      | 100      | 100      |
| Nutrient levels % (Theoretical value) |       |          |          |          |
| DE (Mcal/kg)                          | 3.52  | 3.52     | 3.52     | 3.52     |
| CP                                    | 19.49 | 19.49    | 19.49    | 19.49    |
| L-Lysine                              | 1.18  | 1.18     | 1.18     | 1.18     |
| L-Methionine + L-Cysteine             | 0.68  | 0.68     | 0.68     | 0.68     |
| L-Threonine                           | 0.74  | 0.74     | 0.74     | 0.74     |
| Trp                                   | 0.25  | 0.35     | 0.44     | 0.64     |
| L-Isoleucine                          | 0.75  | 0.75     | 0.75     | 0.75     |
| Nutrient levels % (Chemical analysis) |       |          |          |          |
| Total energy (Mcal/kg)                | 4.05  | 4.08     | 4.02     | 4.02     |
| CP                                    | 20.62 | 21.05    | 20.12    | 20.15    |
| Crude ash                             | 5.3   | 5.3      | 5.8      | 5.3      |

## Online Supporting Material

**Supplementary Table S2.** Ingredients and chemical composition of experimental diets (day 15-28). The basal diets of phase II (11-25 kg BW of piglets).

| Items                                 | Diets |          |          |          |
|---------------------------------------|-------|----------|----------|----------|
|                                       | Ctrl  | 0.1% Trp | 0.2% Trp | 0.4% Trp |
| Ingredients%                          |       |          |          |          |
| Corn                                  | 55.25 | 55.25    | 55.25    | 55.25    |
| Extruded-corn                         | 12    | 12       | 12       | 12       |
| Soybean meal (46%)                    | 13.51 | 13.51    | 13.51    | 13.51    |
| Extruded-soybean                      | 10    | 10       | 10       | 10       |
| Fish meal (63.0%)                     | 3.28  | 3.28     | 3.28     | 3.28     |
| Cornstarch                            | 0.064 | 0.052    | 0.039    | 0.013    |
| Soybean oil                           | 2     | 2        | 2        | 2        |
| L-Lysine (99.0%)                      | 0.15  | 0.15     | 0.15     | 0.15     |
| Trp (98.0%)                           | 0     | 0.102    | 0.204    | 0.408    |
| L-Alanine (99.8%)                     | 0.446 | 0.356    | 0.267    | 0.089    |
| Limestone powder                      | 0.74  | 0.74     | 0.74     | 0.74     |
| Dicalcium phosphate                   | 1.17  | 1.17     | 1.17     | 1.17     |
| Salt                                  | 0.4   | 0.4      | 0.4      | 0.4      |
| 1% Premix                             | 1     | 1        | 1        | 1        |
| Total                                 | 100   | 100      | 100      | 100      |
| Nutrient levels % (Theoretical value) |       |          |          |          |
| DE (Mcal/kg)                          | 3.51  | 3.51     | 3.51     | 3.51     |
| CP                                    | 18.41 | 18.41    | 18.41    | 18.41    |
| L-Lysine                              | 1.07  | 1.07     | 1.07     | 1.07     |
| L-Methionine + L-Cysteine             | 0.65  | 0.65     | 0.65     | 0.65     |
| L-Threonine                           | 0.68  | 0.68     | 0.68     | 0.68     |
| Trp                                   | 0.21  | 0.31     | 0.41     | 0.6      |
| L-Isoleucine                          | 0.69  | 0.69     | 0.69     | 0.69     |
| Nutrient levels % (Chemical analysis) |       |          |          |          |
| Total energy (Mcal/kg)                | 4.05  | 4.03     | 4.04     | 4.05     |
| CP                                    | 18.64 | 18.93    | 18.63    | 18.62    |
| Crude ash                             | 4.5   | 5.4      | 4.8      | 4.7      |

## Online Supporting Material

**Supplementary Table S3.** Effects of dietary Trp supplementation on the growth performance of weanling piglets. Piglets were weaned at 24 days of age and the first day of weaned was recorded as day 0. ADG: Average daily gain; ADFI: Average daily feed intake; FCR: Feed conversion ratio. Means without a common letter differ,  $P < 0.05$ .

| Item           | Diets             |                   |                   |                    | SEM  | P-value |
|----------------|-------------------|-------------------|-------------------|--------------------|------|---------|
|                | Ctrl              | 0.1% Trp          | 0.2% Trp          | 0.4% Trp           |      |         |
| Initial BW, kg | 7.67              | 7.66              | 7.61              | 7.69               | 0.03 | 0.876   |
| Day14 BW, kg   | 10.9 <sup>b</sup> | 11 <sup>b</sup>   | 11.3 <sup>a</sup> | 11.3 <sup>a</sup>  | 0.06 | 0.011   |
| Day28 BW, kg   | 17.6 <sup>b</sup> | 17.8 <sup>b</sup> | 18.8 <sup>a</sup> | 18.3 <sup>ab</sup> | 0.14 | 0.019   |
| ADG, g         |                   |                   |                   |                    |      |         |
| d 0 to 14      | 228 <sup>b</sup>  | 237 <sup>b</sup>  | 264 <sup>a</sup>  | 260 <sup>a</sup>   | 4.45 | 0.003   |
| d 15 to 28     | 484 <sup>b</sup>  | 489 <sup>ab</sup> | 533 <sup>a</sup>  | 496 <sup>ab</sup>  | 7.89 | 0.026   |
| d 0 to 28      | 356 <sup>b</sup>  | 363 <sup>b</sup>  | 398 <sup>a</sup>  | 378 <sup>ab</sup>  | 5.36 | 0.015   |
| ADFI, g        |                   |                   |                   |                    |      |         |
| d 0 to 14      | 352 <sup>b</sup>  | 355 <sup>b</sup>  | 387 <sup>a</sup>  | 382 <sup>a</sup>   | 5.14 | 0.018   |
| d 15 to 28     | 888               | 889               | 894               | 889                | 10.8 | 0.998   |
| d 0 to 28      | 620               | 622               | 640               | 635                | 6.43 | 0.643   |
| FCR            |                   |                   |                   |                    |      |         |
| d 0 to 14      | 1.55              | 1.50              | 1.47              | 1.47               | 0.01 | 0.211   |
| d 15 to 28     | 1.84              | 1.83              | 1.69              | 1.79               | 0.03 | 0.339   |
| d 0 to 28      | 1.74              | 1.72              | 1.61              | 1.68               | 0.02 | 0.213   |

## Online Supporting Material

**Supplementary Table S4:** Primers sequences used for PCR.

| Gene           | Primer sequence (5'- 3') |
|----------------|--------------------------|
| <i>pBD-1-F</i> | TTCCTCCTCATGGTCCTGTT     |
| <i>pBD-1-R</i> | AGGTGCCGATCTGTTTCATC     |
| <i>pBD-2-F</i> | TGTCTGCCTCCTCTCTTCC      |
| <i>pBD-2-R</i> | AACAGGTCCCTTCAATCCTG     |
| <i>pBD-3-F</i> | CCTTCTCTTTGCCTTGCTCTT    |
| <i>pBD-3-R</i> | GCCACTCACAGAACAGCTACC    |
| <i>GAPDH-F</i> | CTCGGAGTGAACGGATTTGG     |
| <i>GAPDH-R</i> | AGTGGAGGTCAATGAAGGGG     |
| <i>341-F</i>   | CCTACGGGRSGCAGCAG        |
| <i>806-R</i>   | GGACTACVVGGTATCTAATC     |

Online Supporting Material

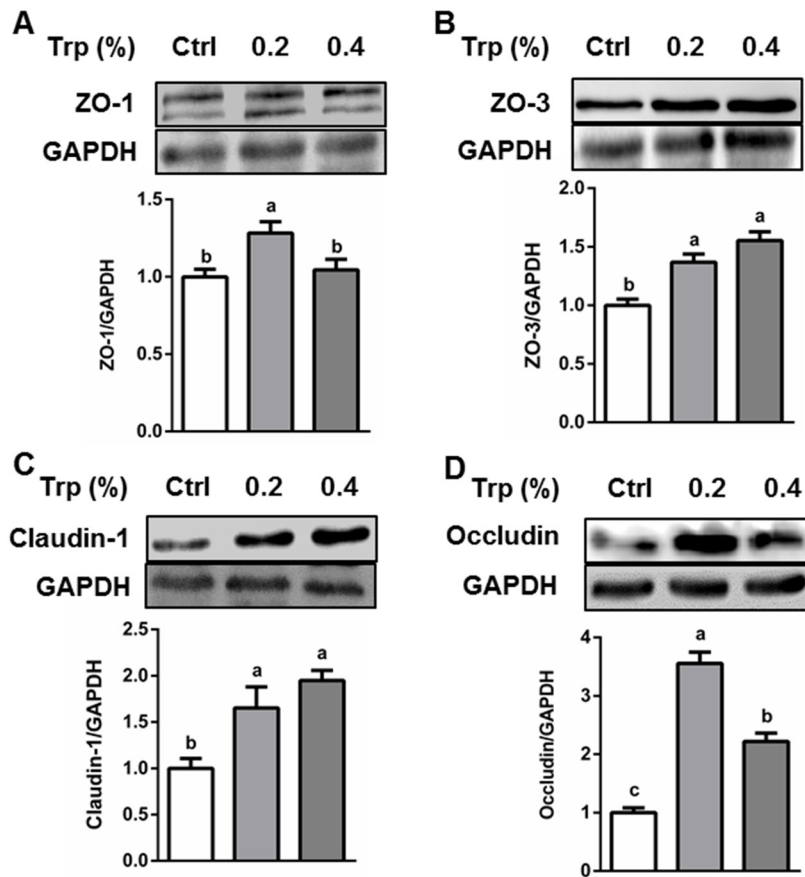

**Supplemental Figure S 1.** Protein abundance of ZO-1, ZO-3, Claudin-1 and Occludin in duodenum. Protein grayscale of ZO-1 (A), ZO-3 (B), claudin-1 (C) and occludin (D) were determined. Values are means  $\pm$  SEMs,  $n = 6$ . Means without a common letter differ,  $P < 0.05$ .

Online Supporting Material

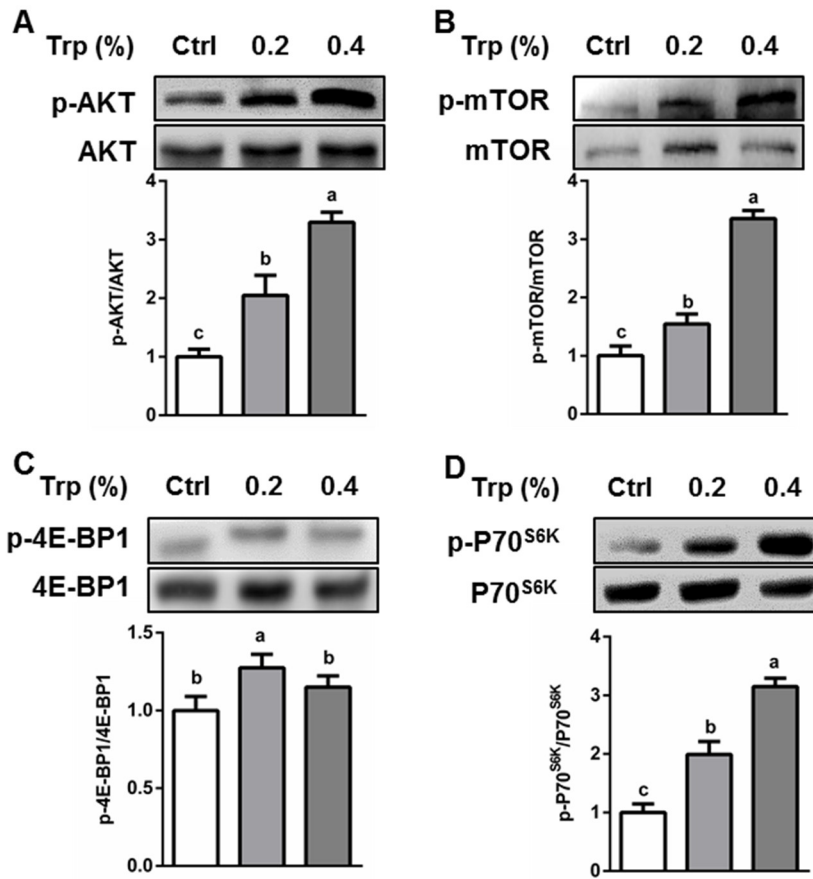

**Supplemental Figure S2.** Dietary Trp supplementation activates mTOR signaling pathway in duodenum. Protein grayscale of AKT (A), p-mTOR (B), p-4E-BP1 (C) and p-P70<sup>S6K</sup> (D) were determined. Values are means  $\pm$  SEMs, n = 6. Means without a common letter differ,  $P < 0.05$ .

## Online Supporting Material

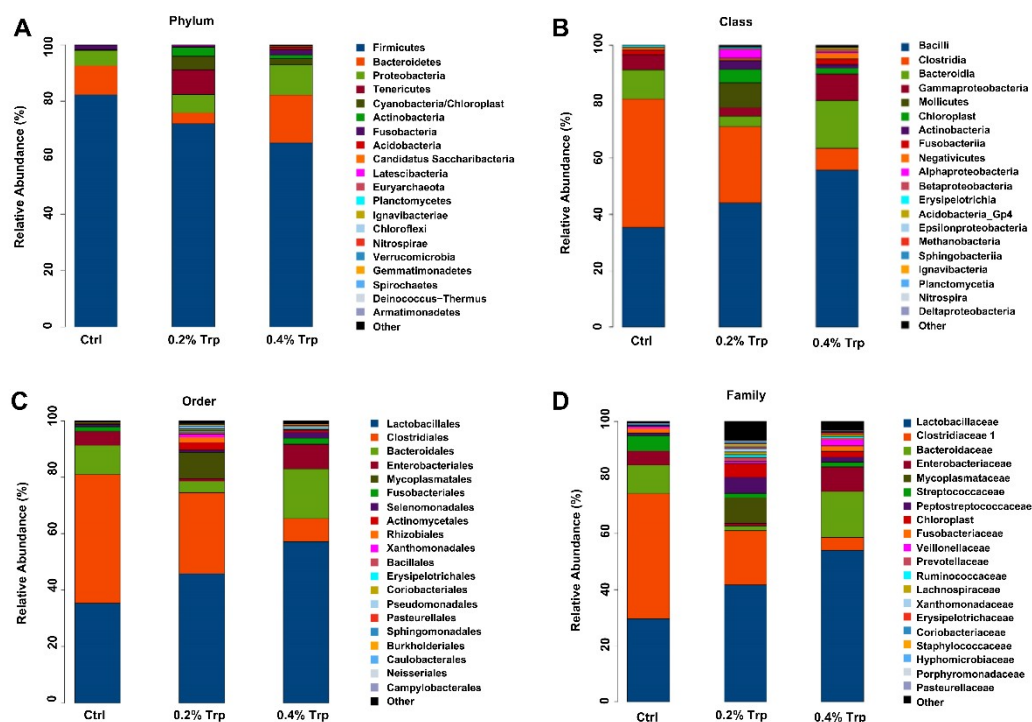

**Supplemental Figure S3.** Shaped bacteria composition at the phylum, class, order and family levels.
